# Supplementary material
Source: PubMed Central journal article supplement (PMC5959274)
Supplement: NIHMS961785-supplement-Supplemental.pdf [file NIHMS961785-supplement-Supplemental.pdf]

Supplementary Figure 1

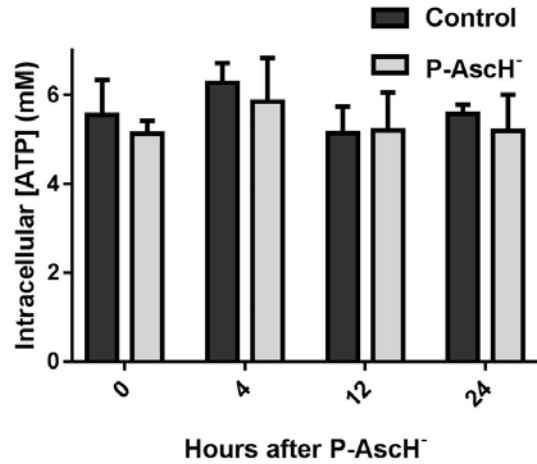

**Supplementary Figure 1. P-Asch<sup>-</sup>-induced inhibition of HIF-1 $\alpha$  is not due to overwhelming cell death.** MIA PaCa-2 cells were treated with 5.4 pmol cell<sup>-1</sup> ascorbate (1.8 mM; 1 x 10<sup>6</sup> cells) for 1 h. Following treatment, medium containing ascorbate was removed, cells were washed with PBS, fresh DMEM medium was added to culture dishes, and cells were returned to 37 °C, 5% CO<sub>2</sub>. Cells were harvested 0, 4, 12, and 24 h following the 1-h ascorbate treatment and intracellular ATP concentration was measured demonstrating that intracellular ATP levels remain stable 24 h after treatment to 5.4 pmol cell<sup>-1</sup> ascorbate in MIA PaCa-2 cells (means  $\pm$  SEM, *n* = 3).

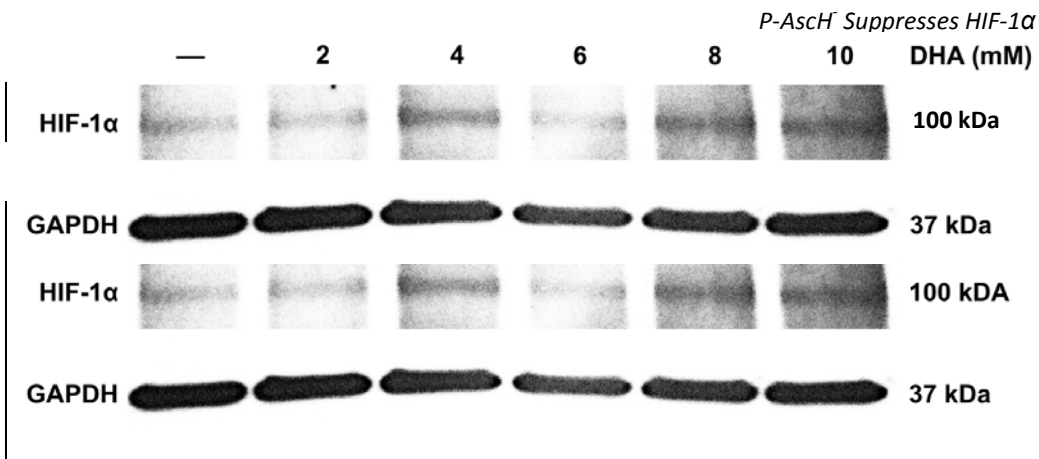

**Supplementary Figure 2. HIF-1 $\alpha$  expression was unchanged upon treatment with varying amounts of dehydroascorbic acid (DHA).** MIA PaCa-2 cells showed stable HIF-1 $\alpha$  expression after 1 h exposure to DHA (2-10 mM, 2-10 pmol cell<sup>-1</sup>).

**Supplementary Figure 3**

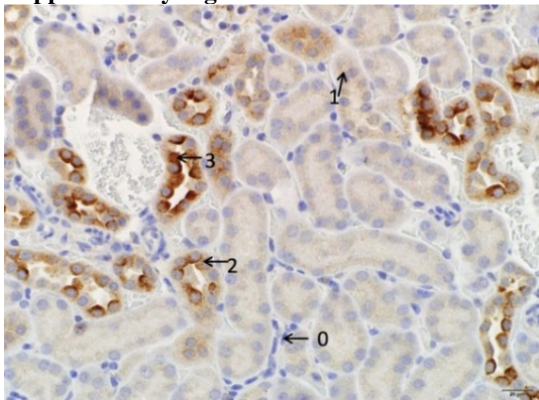

**Supplementary Figure 3. Semi-quantitative scoring for VEGF immunohistochemistry.** Histological section of a murine kidney (positive control tissue for the VEGF immunohistochemical assay) demonstrating the brown immunostaining representative of antibody bound to VEGF in tumor cells. 0: no immunostaining, 1: light immunostaining, 2: moderate immunostaining, 3: dark/abundant immunostaining.
